# Supplementary material
Source: PubMed Central journal article supplement (PMC3685575)
Supplement: NIHMS470175-supplement-1.pdf [file NIHMS470175-supplement-1.pdf]

## Appendix

Table 1A. Stimulus list with relevant length, frequency, and orthographic neighborhood characteristics.

| Word   | Group | Length | HAL   | OrthoN |
|--------|-------|--------|-------|--------|
| AIR    | H     | 3      | 619   | 5      |
| ARTIST | H     | 6      | 130   | 0      |
| BALL   | H     | 4      | 294   | 19     |
| BEHIND | H     | 6      | 495   | 0      |
| BOTTOM | H     | 6      | 332   | 0      |
| CARRY  | H     | 5      | 280   | 7      |
| CASE   | H     | 4      | 1,523 | 14     |
| CAUSE  | H     | 5      | 608   | 1      |
| CHANCE | H     | 6      | 450   | 2      |
| CHIEF  | H     | 5      | 145   | 1      |
| CHILD  | H     | 5      | 494   | 3      |
| CHURCH | H     | 6      | 375   | 0      |
| CLAIM  | H     | 5      | 432   | 1      |
| CLOSE  | H     | 5      | 648   | 3      |
| COLD   | H     | 4      | 266   | 12     |
| COLOR  | H     | 5      | 571   | 1      |
| CUT    | H     | 3      | 757   | 13     |
| DESK   | H     | 4      | 104   | 3      |
| DINNER | H     | 6      | 99    | 2      |
| DOCTOR | H     | 6      | 244   | 0      |
| DRIVE  | H     | 5      | 1,311 | 1      |
| EIGHT  | H     | 5      | 133   | 7      |
| FATHER | H     | 6      | 290   | 4      |
| FEEL   | H     | 4      | 1,237 | 9      |
| FEET   | H     | 4      | 306   | 8      |
| FILM   | H     | 4      | 402   | 3      |
| FINAL  | H     | 5      | 374   | 0      |
| FIRE   | H     | 4      | 479   | 13     |
| FOOD   | H     | 4      | 456   | 9      |
| FORCE  | H     | 5      | 575   | 3      |
| FREE   | H     | 4      | 1,863 | 4      |
| GAS    | H     | 3      | 197   | 8      |
| GIRL   | H     | 4      | 308   | 2      |
| GOAL   | H     | 4      | 199   | 4      |
| GUN    | H     | 3      | 361   | 13     |
| HAPPEN | H     | 6      | 505   | 0      |
| HIGH   | H     | 4      | 1,416 | 3      |

|         |   |   |       |    |
|---------|---|---|-------|----|
| HOME    | H | 4 | 1,454 | 9  |
| HOTEL   | H | 5 | 155   | 1  |
| HOUSE   | H | 5 | 795   | 5  |
| HUMAN   | H | 5 | 1,375 | 0  |
| INDEX   | H | 5 | 248   | 0  |
| JOB     | H | 3 | 1,161 | 14 |
| KITCHEN | H | 7 | 74    | 0  |
| LABOR   | H | 5 | 144   | 0  |
| LAND    | H | 4 | 573   | 11 |
| LARGE   | H | 5 | 1,026 | 2  |
| LATER   | H | 5 | 825   | 7  |
| LESS    | H | 4 | 1,209 | 8  |
| LETTER  | H | 6 | 445   | 6  |
| LIFE    | H | 4 | 1,676 | 9  |
| LIKE    | H | 4 | 8,098 | 12 |
| LONG    | H | 4 | 2,091 | 7  |
| LOSS    | H | 4 | 229   | 13 |
| MACHINE | H | 7 | 924   | 0  |
| MAJOR   | H | 5 | 766   | 2  |
| MONEY   | H | 5 | 1,600 | 3  |
| MOTOR   | H | 5 | 107   | 1  |
| MUSIC   | H | 5 | 1,026 | 0  |
| NAME    | H | 4 | 2,272 | 8  |
| NOVEL   | H | 5 | 94    | 2  |
| PAID    | H | 4 | 382   | 7  |
| PARTY   | H | 5 | 525   | 6  |
| PICTURE | H | 7 | 355   | 0  |
| PIECE   | H | 5 | 352   | 1  |
| PLACE   | H | 5 | 1,490 | 4  |
| PLANE   | H | 5 | 143   | 5  |
| PRETTY  | H | 6 | 992   | 0  |
| ROAD    | H | 4 | 509   | 6  |
| SEA     | H | 3 | 280   | 10 |
| SHIP    | H | 4 | 392   | 8  |
| SIDE    | H | 4 | 858   | 10 |
| SIGHT   | H | 5 | 109   | 8  |
| SIGN    | H | 4 | 301   | 1  |
| SIX     | H | 3 | 333   | 11 |
| SORT    | H | 4 | 603   | 7  |
| SOUND   | H | 5 | 934   | 7  |
| SOUTH   | H | 5 | 506   | 3  |
| STAGE   | H | 5 | 234   | 6  |

|         |   |   |        |    |
|---------|---|---|--------|----|
| START   | H | 5 | 1,317  | 4  |
| STATION | H | 7 | 291    | 0  |
| STORY   | H | 5 | 740    | 4  |
| STUDENT | H | 7 | 431    | 0  |
| STUDY   | H | 5 | 389    | 1  |
| STYLE   | H | 5 | 330    | 2  |
| TABLE   | H | 5 | 428    | 4  |
| THERE   | H | 5 | 10,026 | 3  |
| THING   | H | 5 | 1,860  | 4  |
| TODAY   | H | 5 | 791    | 1  |
| TOP     | H | 3 | 890    | 16 |
| TOTAL   | H | 5 | 538    | 1  |
| VIEW    | H | 4 | 573    | 2  |
| VOICE   | H | 5 | 625    | 0  |
| WAIT    | H | 4 | 471    | 10 |
| WELL    | H | 4 | 4,218  | 12 |
| WISH    | H | 4 | 567    | 7  |
| WOMAN   | H | 5 | 508    | 2  |
| WORLD   | H | 5 | 2,256  | 1  |
| YELLOW  | H | 6 | 147    | 3  |
| YOU     | H | 3 | 38,401 | 2  |
| ADEPT   | L | 5 | 13     | 2  |
| ANVIL   | L | 5 | 7      | 0  |
| APRON   | L | 5 | 4      | 2  |
| ARID    | L | 4 | 3      | 5  |
| AWE     | L | 3 | 21     | 12 |
| BANJO   | L | 5 | 8      | 0  |
| BEAN    | L | 4 | 27     | 14 |
| BEGGAR  | L | 6 | 5      | 0  |
| BOOM    | L | 4 | 33     | 10 |
| CANON   | L | 5 | 50     | 1  |
| CARVE   | L | 5 | 7      | 3  |
| CAVERN  | L | 6 | 6      | 1  |
| CHEER   | L | 5 | 15     | 3  |
| CHORE   | L | 5 | 4      | 5  |
| COMIC   | L | 5 | 130    | 2  |
| CONCEDE | L | 7 | 15     | 0  |
| CORAL   | L | 5 | 37     | 1  |
| COWARD  | L | 6 | 13     | 2  |
| CRATE   | L | 5 | 16     | 6  |
| DENSE   | L | 5 | 23     | 2  |
| DUAL    | L | 4 | 102    | 4  |

|        |   |   |     |    |
|--------|---|---|-----|----|
| DUMMY  | L | 5 | 26  | 5  |
| DUNE   | L | 4 | 17  | 11 |
| DUSK   | L | 4 | 6   | 9  |
| EDIT   | L | 4 | 154 | 2  |
| EMBARK | L | 6 | 4   | 1  |
| EXIT   | L | 4 | 196 | 2  |
| FARE   | L | 4 | 41  | 19 |
| FLOAT  | L | 5 | 43  | 2  |
| FLU    | L | 3 | 12  | 1  |
| FLUTE  | L | 5 | 27  | 2  |
| GAZE   | L | 4 | 19  | 12 |
| GORGE  | L | 5 | 6   | 2  |
| GRAPE  | L | 5 | 12  | 9  |
| GRAVEL | L | 6 | 18  | 5  |
| HASTE  | L | 5 | 6   | 6  |
| HICK   | L | 4 | 3   | 11 |
| HOBBY  | L | 5 | 60  | 4  |
| HOWL   | L | 4 | 25  | 5  |
| JARGON | L | 6 | 12  | 0  |
| JOLT   | L | 4 | 6   | 5  |
| LASS   | L | 4 | 6   | 14 |
| LOFT   | L | 4 | 6   | 5  |
| LORD   | L | 4 | 290 | 7  |
| LUST   | L | 4 | 43  | 12 |
| MAGNET | L | 6 | 17  | 0  |
| MARCH  | L | 5 | 570 | 3  |
| MASK   | L | 4 | 94  | 9  |
| MAYOR  | L | 5 | 33  | 2  |
| MENTOR | L | 6 | 28  | 0  |
| MERRY  | L | 5 | 14  | 6  |
| MESH   | L | 4 | 15  | 4  |
| MINT   | L | 4 | 645 | 12 |
| MULE   | L | 4 | 11  | 7  |
| MUNCH  | L | 5 | 9   | 5  |
| OUNCE  | L | 5 | 17  | 1  |
| PAIL   | L | 4 | 4   | 17 |
| PEACH  | L | 5 | 14  | 7  |
| PLUMP  | L | 5 | 4   | 4  |
| POLAR  | L | 5 | 28  | 2  |
| QUEEN  | L | 5 | 133 | 1  |
| RIM    | L | 3 | 28  | 12 |
| ROAST  | L | 5 | 11  | 4  |

|         |    |   |     |    |
|---------|----|---|-----|----|
| RUDE    | L  | 4 | 56  | 9  |
| RULER   | L  | 5 | 21  | 2  |
| RUMOR   | L  | 5 | 52  | 2  |
| SCOOP   | L  | 5 | 20  | 5  |
| SCRATCH | L  | 7 | 62  | 0  |
| SCRUB   | L  | 5 | 7   | 1  |
| SEAM    | L  | 4 | 8   | 13 |
| SERVANT | L  | 7 | 25  | 0  |
| SHRUG   | L  | 5 | 13  | 1  |
| SKULL   | L  | 5 | 56  | 3  |
| SLAB    | L  | 4 | 7   | 12 |
| SMASH   | L  | 5 | 20  | 3  |
| SOCK    | L  | 4 | 9   | 13 |
| SPICE   | L  | 5 | 20  | 7  |
| SPIN    | L  | 4 | 82  | 5  |
| SPOIL   | L  | 5 | 14  | 1  |
| SPOON   | L  | 5 | 20  | 4  |
| SPY     | L  | 3 | 40  | 7  |
| STACK   | L  | 5 | 112 | 11 |
| STINK   | L  | 5 | 12  | 6  |
| STOOL   | L  | 5 | 9   | 3  |
| THORN   | L  | 5 | 28  | 1  |
| THRILL  | L  | 6 | 20  | 1  |
| TORCH   | L  | 5 | 19  | 2  |
| TRAITOR | L  | 7 | 9   | 1  |
| TRAMP   | L  | 5 | 5   | 2  |
| TROUT   | L  | 5 | 15  | 0  |
| UNCLE   | L  | 5 | 82  | 0  |
| VALVE   | L  | 5 | 35  | 4  |
| VEIL    | L  | 4 | 14  | 3  |
| VILE    | L  | 4 | 21  | 12 |
| WEAVE   | L  | 5 | 9   | 3  |
| WELD    | L  | 4 | 9   | 7  |
| WITCH   | L  | 5 | 62  | 6  |
| WIZARD  | L  | 6 | 94  | 1  |
| WRECK   | L  | 5 | 16  | 2  |
| ZOO     | L  | 3 | 33  | 7  |
| AMANG   | NW | 5 |     | 1  |
| BAW     | NW | 3 |     | 14 |
| BEIRN   | NW | 5 |     | 1  |
| BEMONS  | NW | 6 |     | 2  |
| BIHEAV  | NW | 6 |     | 0  |

|         |    |   |    |
|---------|----|---|----|
| BIRGAN  | NW | 6 | 0  |
| BOAK    | NW | 4 | 6  |
| BOIM    | NW | 4 | 3  |
| BOITT   | NW | 5 | 0  |
| BONSE   | NW | 5 | 0  |
| BORST   | NW | 5 | 4  |
| BOUB    | NW | 4 | 3  |
| BOUP    | NW | 4 | 3  |
| BOUR    | NW | 4 | 11 |
| BROME   | NW | 5 | 1  |
| BRULLAN | NW | 7 | 0  |
| BRUTH   | NW | 5 | 4  |
| CAMFAR  | NW | 6 | 0  |
| CAMMEN  | NW | 6 | 1  |
| CAMPLOO | NW | 7 | 0  |
| CANSAR  | NW | 6 | 1  |
| CARSH   | NW | 5 | 2  |
| CATTEN  | NW | 6 | 2  |
| CEF     | NW | 3 | 1  |
| CEROOR  | NW | 6 | 0  |
| CHALLO  | NW | 6 | 0  |
| CHOIK   | NW | 5 | 2  |
| CHOOF   | NW | 5 | 0  |
| CIRBAN  | NW | 6 | 0  |
| CLORK   | NW | 5 | 4  |
| CONSAR  | NW | 6 | 0  |
| CONSUN  | NW | 6 | 1  |
| COOD    | NW | 4 | 12 |
| COOGE   | NW | 5 | 0  |
| COUM    | NW | 4 | 2  |
| COV     | NW | 3 | 10 |
| CRADET  | NW | 6 | 0  |
| CRAT    | NW | 4 | 8  |
| CUFFAY  | NW | 6 | 0  |
| DALT    | NW | 4 | 9  |
| DEACE   | NW | 5 | 2  |
| DEAT    | NW | 4 | 17 |
| DEBBLE  | NW | 6 | 2  |
| DECE    | NW | 4 | 2  |
| DESCARS | NW | 7 | 0  |
| DIHF    | NW | 4 | 0  |
| DITOLE  | NW | 6 | 1  |

|        |    |   |    |
|--------|----|---|----|
| DOULE  | NW | 5 | 2  |
| DOUZ   | NW | 4 | 2  |
| DRAS   | NW | 4 | 5  |
| DREM   | NW | 4 | 4  |
| DROMB  | NW | 5 | 0  |
| DUT    | NW | 3 | 15 |
| EAP    | NW | 3 | 13 |
| FAGE   | NW | 4 | 13 |
| FARN   | NW | 4 | 12 |
| FEARTY | NW | 6 | 2  |
| FERAN  | NW | 5 | 1  |
| FIMUS  | NW | 5 | 0  |
| FLOD   | NW | 4 | 8  |
| FLOOCE | NW | 6 | 0  |
| FLOOM  | NW | 5 | 4  |
| FLORT  | NW | 5 | 3  |
| FOLT   | NW | 4 | 11 |
| FRAKLE | NW | 6 | 0  |
| FRANT  | NW | 5 | 4  |
| FREAM  | NW | 5 | 3  |
| FRIN   | NW | 4 | 3  |
| FROLE  | NW | 5 | 1  |
| FROTE  | NW | 5 | 3  |
| FROUDA | NW | 6 | 0  |
| FURSE  | NW | 5 | 3  |
| FUTHOR | NW | 6 | 1  |
| GEAM   | NW | 4 | 8  |
| GEMBOL | NW | 6 | 0  |
| GEWS   | NW | 4 | 5  |
| GIRDAN | NW | 6 | 0  |
| GLAE   | NW | 4 | 3  |
| GOACE  | NW | 5 | 2  |
| GREPE  | NW | 5 | 4  |
| GRIE   | NW | 4 | 6  |
| GRINE  | NW | 5 | 6  |
| GUTE   | NW | 4 | 5  |
| HANNY  | NW | 5 | 6  |
| HEAKE  | NW | 5 | 1  |
| HOARO  | NW | 5 | 2  |
| HOF    | NW | 3 | 5  |
| HOIZE  | NW | 5 | 0  |
| HOOVE  | NW | 5 | 0  |

|         |    |   |    |
|---------|----|---|----|
| HOZ     | NW | 3 | 5  |
| ILLWOY  | NW | 6 | 0  |
| JARM    | NW | 4 | 4  |
| JILE    | NW | 4 | 11 |
| JONTLE  | NW | 6 | 1  |
| JORK    | NW | 4 | 7  |
| JUNDER  | NW | 6 | 1  |
| KIPY    | NW | 4 | 0  |
| KNOIT   | NW | 5 | 0  |
| KONDY   | NW | 5 | 0  |
| LADDLE  | NW | 6 | 4  |
| LARN    | NW | 4 | 9  |
| LEMM    | NW | 4 | 0  |
| LIRCH   | NW | 5 | 2  |
| LOAP    | NW | 4 | 7  |
| LODDER  | NW | 6 | 4  |
| LOICE   | NW | 5 | 1  |
| LOUST   | NW | 5 | 3  |
| MANT    | NW | 4 | 11 |
| MATTUL  | NW | 6 | 0  |
| MEARNIN | NW | 7 | 0  |
| MOIR    | NW | 4 | 1  |
| MOTCH   | NW | 5 | 5  |
| MOUDEN  | NW | 6 | 0  |
| MUKE    | NW | 4 | 9  |
| MUTH    | NW | 4 | 8  |
| NACE    | NW | 4 | 8  |
| NARSE   | NW | 5 | 3  |
| NEIZE   | NW | 5 | 1  |
| NELD    | NW | 4 | 4  |
| NIZE    | NW | 4 | 4  |
| NOOTY   | NW | 5 | 2  |
| NOUCE   | NW | 5 | 0  |
| NOUTE   | NW | 5 | 1  |
| OUZY    | NW | 4 | 1  |
| PANSOL  | NW | 6 | 0  |
| PEIP    | NW | 4 | 1  |
| PHANNE  | NW | 6 | 0  |
| PHOM    | NW | 4 | 2  |
| PILLOT  | NW | 6 | 1  |
| POPLE   | NW | 5 | 0  |
| PORPLE  | NW | 6 | 1  |



|         |    |   |    |
|---------|----|---|----|
| PRESOI  | NW | 6 | 0  |
| PRIVE   | NW | 5 | 7  |
| RAF     | NW | 3 | 10 |
| RATHAM  | NW | 6 | 0  |
| REAB    | NW | 4 | 5  |
| REAZE   | NW | 5 | 0  |
| RESURS  | NW | 6 | 0  |
| ROIDE   | NW | 5 | 0  |
| ROIP    | NW | 4 | 1  |
| ROULY   | NW | 5 | 0  |
| RUNKLE  | NW | 6 | 0  |
| SAMENT  | NW | 6 | 1  |
| SANTRO  | NW | 6 | 0  |
| SARTEN  | NW | 6 | 0  |
| SATCH   | NW | 5 | 7  |
| SERPRAZ | NW | 7 | 0  |
| SHAP    | NW | 4 | 11 |
| SHOAP   | NW | 5 | 1  |
| SHOIR   | NW | 5 | 1  |
| SHOV    | NW | 4 | 6  |
| SINDOL  | NW | 6 | 0  |
| SINDWHA | NW | 7 | 0  |
| SINY    | NW | 4 | 5  |
| SIRD    | NW | 4 | 4  |
| SKULP   | NW | 5 | 2  |
| SLOOK   | NW | 5 | 4  |
| SLOTE   | NW | 5 | 5  |
| SOID    | NW | 4 | 6  |
| SOIN    | NW | 4 | 9  |
| SOOWOI  | NW | 6 | 0  |
| SORCH   | NW | 5 | 2  |
| SORVE   | NW | 5 | 2  |
| SOUT    | NW | 4 | 14 |
| SOUZE   | NW | 5 | 0  |
| SOWK    | NW | 4 | 3  |
| SPART   | NW | 5 | 7  |
| SPRUD   | NW | 5 | 0  |
| STOMPAD | NW | 7 | 1  |
| STOOM   | NW | 5 | 4  |
| STRALE  | NW | 6 | 0  |
| SUKE    | NW | 4 | 6  |
| SWARL   | NW | 5 | 3  |

|        |    |   |    |
|--------|----|---|----|
| TADE   | NW | 4 | 11 |
| TARKOY | NW | 6 | 0  |
| TAZE   | NW | 4 | 12 |
| THOY   | NW | 4 | 5  |
| THRA   | NW | 4 | 2  |
| THRAT  | NW | 5 | 0  |
| THROD  | NW | 5 | 2  |
| TINCE  | NW | 5 | 5  |
| TOIM   | NW | 4 | 2  |
| TONSHA | NW | 6 | 0  |
| TOULT  | NW | 5 | 0  |
| TRAFF  | NW | 5 | 0  |
| TRUBE  | NW | 5 | 2  |
| TRULE  | NW | 5 | 2  |
| TUPE   | NW | 4 | 5  |
| UPE    | NW | 3 | 3  |
| VALLEN | NW | 6 | 2  |
| VOCAME | NW | 6 | 0  |
| VULT   | NW | 4 | 2  |
| WAIRD  | NW | 5 | 2  |
| WARTH  | NW | 5 | 4  |
| WEAGE  | NW | 5 | 2  |
| WOUT   | NW | 4 | 7  |
| WRONT  | NW | 5 | 2  |
| WUTE   | NW | 4 | 3  |
| YEAK   | NW | 4 | 6  |
| YOULD  | NW | 5 | 4  |

---

Note: H = High frequency, L = Low frequency, NW = Non-word; HAL = Frequency counts per million from the Hyperspace Analogue to Language (HAL) norms; OrthoN = Orthographic neighborhood
